# Supplementary material for: Comparison of Tribological Characteristics of AA2024 Coated by Plasma Electrolytic Oxidation (PEO) Sealed by Different sol–gel Layers
Source: MDPI journal article supplement (doi:10.3390/coatings13050871), 2023-05-05
Supplement: s1 [file s1]

## Article

# Supplementary Materials: Comparison of Tribological Characteristics of AA2024 Coated by Plasma Electrolytic Oxidation (PEO) Sealed by Different Sol–Gel Layers

Hafiza Ayesha Khalid <sup>1,2</sup>, Sajjad Akbarzadeh <sup>1,2</sup>, Yoann Paint <sup>3</sup>, Véronique Vitry <sup>2</sup> and Marie-Georges Olivier <sup>1,3,\*</sup>
<sup>1</sup> Materials Science Department, Faculty of Engineering, University of Mons, 20, Place du Parc, 7000 Mons, Belgium; hafizaayesha.khalid@umons.ac.be (H.A.K.)

<sup>2</sup> Metallurgy Department, Faculty of Engineering, University of Mons, 20, Place du Parc, 7000 Mons, Belgium; veronique.vitry@umons.ac.be

<sup>3</sup> Materia Nova Research Centre, 1, Avenue N. Copernic, Parc Initialis, 7000 Mons, Belgium

\* Correspondence: marjorie.olivier@umons.ac.be

**Table S1.** Composition of the sol-gel used to seal PEO pores through dip coating.

| Composition |                         |                                                                                                                                        |
|-------------|-------------------------|----------------------------------------------------------------------------------------------------------------------------------------|
| PSG         |                         | TEOS: 20% (v/v), GPTMS: 10% (v/v), Ethanol: 10% (v/v), Deionized water: 60% (v/v).                                                     |
| PSG-MT      | Si-based precursor      | TEOS: 10% (v/v), GPTMS: 10% (v/v), MTES: 10% (v/v), Ethanol: 10% (v/v), Deionized water: 60% (v/v).                                    |
| PSG-AP      |                         | TEOS: 15% (v/v), APTES: 15% (v/v), Ethanol: 56% (v/v), Deionized water: 14% (v/v), Acetic acid: drop by drop until pH 4.5 is obtained. |
|             |                         | Mixture of two sols:                                                                                                                   |
| PSG-ZT      | Si/Zr – based precursor | Sol-1 — TEOS: 0.18 mol, MAPTAMS: 1 mol, Deionized water: 2.075 mol, HCl: 0.001 mol.                                                    |
|             |                         | Sol-2 — ZTP: 0.12 mol, MAA: 0.12 mol, IPA: 0.4 mol.                                                                                    |

**Disclaimer/Publisher’s Note:** The statements, opinions and data contained in all publications are solely those of the individual author(s) and contributor(s) and not of MDPI and/or the editor(s). MDPI and/or the editor(s) disclaim responsibility for any injury to people or property resulting from any ideas, methods, instructions or products referred to in the content.
